# Supplementary material for: Association between adequate dietary protein and all-cause and cardiovascular mortality in patients with selective glomerular hypofiltration syndrome
Source: Royal Society of Chemistry journal article supplement (doi:10.1039/d3fo03212d), 2024-01-01
Supplement: d3fo03212d1.pdf [file d3fo03212d1.pdf]

Association between Adequate dietary protein and all-cause and cardiovascular mortality in patients with selective glomerular hypofiltration syndromes

European Journal of Nutrition

Ruming Shen; Zhongjiao Xu; Li Lin; Jiayi Shen; Wuming Hu; Lingchun Lv; Tiemin Wei

**Corresponding Author:** Tiemin Wei, MD, Department of Cardiology, Lishui Hospital, Zhejiang University School of Medicine, No.289, Kuocang Road, Liandu District, Lishui, China, 323000. Email: lswtm@sina.com

**Co-corresponding author:** Lingchun Lv

E-mail: lvlingchun@medmail.com.cn

### Method 1. Laboratory Methodology for Cystatin C and creatinine

Cystatin C levels were determined using a Cystatin C immunoassay on an automated multi-channel analyzer (Siemens Dimension Vista 1500, Siemens Healthcare Diagnostics).

For the measurement of creatinine levels, an improved version of the Jaffé reaction, as modified by Popper et al and Seeling and Wuest, was utilized. Any values below 0.6 mg/dL were considered insignificant and treated as missing data. It is noteworthy that there were notable discrepancies between creatinine levels measured during NHANES 1999-2000 and the gold standard reference method [Roche coupled enzymatic assay (creatininase, creatinase, sarcosine oxidase, kits #1775677 and 1775766) performed on a Roche P Module instrument]. Consequently, Deming regression was employed to correct the creatinine results for NHANES 1999-2000, following the recommendation provided on the NHANES official website [Standard Creatinine (Y) = 1.013\*NHANES Creatinine (X) + 0.147 (r = 0.984)].

### Method 2. List of the twenty-eight food parameters used in the calculation of DII

Carbohydrates, protein, total fat, alcohol, fiber, cholesterol, saturated fat, monounsaturated fatty acids (MUFAs), polyunsaturated fatty acids (PUFAs), niacin, vitamin A, thiamin, riboflavin, vitamin B6, vitamin B12, vitamin C, vitamin D, vitamin E, Fe, Mg, Zinc, Selenium, folic acid,  $\beta$ -carotene, caffeine, energy, n-3 fatty acids, and n-6 fatty acids.<sup>1</sup>

**Table S1 Definitions of variables**

| Variables                                                             | Definition                                                                                                                                                                                                                                                                                                                                                                                     |
|-----------------------------------------------------------------------|------------------------------------------------------------------------------------------------------------------------------------------------------------------------------------------------------------------------------------------------------------------------------------------------------------------------------------------------------------------------------------------------|
| Verifying dietary interview as reliable and met the minimum standards | Less than 25% foods with missing descriptive information (e.g., caffeinated or decaffeinated, preparation methods, or brand names); and<br>Less than 15% foods with missing amounts; and<br>Any meal reported must have at least one known food. For example, if a respondent reported having a lunch but could not remember any foods from that lunch, the recall did not meet the criterion. |
| Pregnancy                                                             | Pregnancy status at the time of examination is reported for females 8-59 years of age. Persons who reported they were pregnant at the time of exam or the urine test was positive, the status was coded as pregnant.                                                                                                                                                                           |
| Income levels <sup>2</sup>                                            | Low income: PIR $\leq$ 1.3                                                                                                                                                                                                                                                                                                                                                                     |

|                              |                                                                                                                                                                                                                                                                                                                                                                                                                                                                                                  |
|------------------------------|--------------------------------------------------------------------------------------------------------------------------------------------------------------------------------------------------------------------------------------------------------------------------------------------------------------------------------------------------------------------------------------------------------------------------------------------------------------------------------------------------|
|                              | Median income: $3.5 \geq \text{PIR} > 1.3$<br>High income: $\text{PIR} > 3.5$                                                                                                                                                                                                                                                                                                                                                                                                                    |
| Ethnicity <sup>3</sup>       | Ethnicity was classified as Mexican American, Non-Hispanic Black, Non-Hispanic White, and other.                                                                                                                                                                                                                                                                                                                                                                                                 |
| Educational levels           | Educational levels were categorized as less than high school and equal to or above high school.                                                                                                                                                                                                                                                                                                                                                                                                  |
| Smoking status <sup>4</sup>  | Current smoking: smoked more than 100 cigarettes in life and smoke some days or every day<br>Former smoking: smoked more than 100 cigarettes in life and smoke not at all now<br>Never smoking: smoked less than 100 cigarettes in life                                                                                                                                                                                                                                                          |
| Drinking status <sup>4</sup> | Current drinking: including current light/moderate drinker ( $\leq 1$ drink per day for women or $\leq 2$ drinks per day for men on average over the past year), or current heavier drinker ( $> 1$ drink per day for women or $> 2$ drinks per day for men on average over the past year);<br>Former drinking: had $\geq 12$ drinks in 1 year and did not drink last year, or did not drink last year but drank $\geq 12$ drinks in lifetime;<br>Never drinking: had $< 12$ drinks in lifetime; |
| Hyperlipidemia               | A total triglyceride level $\geq 150\text{mg/dL}$ ; or<br>Total cholesterol level $\geq 200\text{mg/dL}$ ; or<br>Low-density lipoprotein level $\geq 130\text{mg/dL}$ ; or<br>High-density lipoprotein (HDL) level $< 40\text{mg/dL}$ for males and $< 50\text{mg/dL}$ for females; or<br>Using lipid-lowering medications at baseline.                                                                                                                                                          |
| Hypertension                 | Being previously diagnosed with hypertension by a healthcare professional; or<br>Having a blood pressure (BP) reading $\geq 140/90\text{mmHg}$ on at least three out of four measurements; or<br>Using anti-hypertensive medications at baseline.                                                                                                                                                                                                                                                |
| Diabetes                     | Being previously diagnosed with diabetes by a healthcare professional; or<br>Having a glycohemoglobin level $> 6.5\%$ , fasting glucose level $\geq 7.0\text{ mmol/L}$ random blood glucose level $\geq 11.1\text{ mmol/L}$ , two-hour oral glucose tolerance test (OGTT) blood glucose level $\geq 11.1\text{ mmol/L}$ ; or<br>Using diabetes medications or insulin at baseline.                                                                                                               |
| Cardiovascular disease       | Being previously diagnosed with coronary heart disease (CHD), congestive heart failure (HF), heart attack, stroke, or angina                                                                                                                                                                                                                                                                                                                                                                     |

|                  |                                                                                                                                                                                        |
|------------------|----------------------------------------------------------------------------------------------------------------------------------------------------------------------------------------|
|                  | by a healthcare professional                                                                                                                                                           |
| Medication Usage | Taking angiotensin-converting enzyme inhibitors (ACEIs), angiotensin-II receptor blockers (ARBs), $\beta$ blockers, or spironolactone at baseline were considered as taking medication |

---

PIR, family income to poverty

**Table S2 Definition of red meat and other protein food <sup>5, 6</sup>**

| Food component          |                                                                                                                   | Foods |
|-------------------------|-------------------------------------------------------------------------------------------------------------------|-------|
| Red Meat                |                                                                                                                   |       |
| Meat                    | Beef, veal, pork, lamb, and game meat; excludes organ meat and cured meat                                         |       |
| Cured Meat              | Frankfurters, sausages, corned beef, cured ham and luncheon meat that are made from beef, pork, or poultry        |       |
| Organ Meat              | Organ meat from beef, veal, pork, lamb, game, and poultry                                                         |       |
| Other Protein Food      |                                                                                                                   |       |
| Poultry                 | Chicken, turkey, Cornish hens, duck, goose, quail, and pheasant (game birds),; excludes organ meat and cured meat |       |
| Seafood                 | Finfish, shellfish, and other seafood                                                                             |       |
| Eggs                    | Eggs (chicken, duck, goose, quail) and egg substitutes                                                            |       |
| Soy Products            | Soy products, excluding calcium fortified soy milk and products made with raw (green) soybean                     |       |
| Nuts and Seeds          | Peanuts, tree nuts, and seeds; excludes coconut                                                                   |       |
| Bean, Peas, and Lentils | Bean, peas, and lentils (legumes)                                                                                 |       |

**Table S3 The impact of dietary protein intake on all-cause mortality of patients with selective glomerular hypofiltration syndromes across different subgroups.**

| Subgroups     | Death/n  | Quintile of Dietary Protein Intake (g/d) |                   |                   |                   | P-Values for Trend | P-Values for Interaction |
|---------------|----------|------------------------------------------|-------------------|-------------------|-------------------|--------------------|--------------------------|
|               |          | Q1                                       | Q2                | Q3                | Q4                |                    |                          |
| Median (g/d)  |          | 38.51                                    | 59.59             | 76.13             | 104.86            |                    |                          |
| Age≥65y       | 309/501  | Ref                                      | 0.67 [0.45, 0.99] | 1.17 [0.77, 1.78] | 0.93 [0.58, 1.49] | 0.958              | <0.001                   |
| P-Value       |          |                                          | 0.047             | 0.450             | 0.771             |                    |                          |
| Median (g/d)  |          | 46.92                                    | 74.17             | 96.83             | 139.49            |                    |                          |
| Age<65y       | 140/1667 | Ref                                      | 0.56 [0.35, 0.92] | 0.38 [0.21, 0.70] | 0.42 [0.21, 0.82] | 0.011              |                          |
| P-Value       |          |                                          | 0.021             | 0.002             | 0.011             |                    |                          |
| Median (g/d)  |          | 54.12                                    | 79.14             | 104.20            | 145.65            |                    |                          |
| Male          | 279/1359 | Ref                                      | 0.61 [0.45, 0.84] | 0.51 [0.33, 0.78] | 0.55 [0.33, 0.92] | 0.007              | <0.001                   |
| P-Value       |          |                                          | 0.003             | 0.002             | 0.024             |                    |                          |
| Median (g/d)  |          | 35.46                                    | 56.19             | 73.70             | 99.74             |                    |                          |
| Female        | 170/809  | Ref                                      | 1.03 [0.63, 1.70] | 2.62 [1.49, 4.62] | 2.74 [1.44, 5.20] | 0.001              |                          |
| P-Value       |          |                                          | 0.893             | 0.001             | 0.002             |                    |                          |
| Median (g/d)  |          | 36.41                                    | 59.05             | 80.91             | 123.76            |                    |                          |
| Low Income    | 101/386  | Ref                                      | 0.76 [0.34, 1.65] | 2.10 [0.86, 5.17] | 1.49 [0.49, 4.56] | 0.349              | 0.005                    |
| P-Value       |          |                                          | 0.482             | 0.105             | 0.481             |                    |                          |
| Median (g/d)  |          | 43.62                                    | 65.14             | 84.62             | 133.23            |                    |                          |
| Median Income | 188/712  | Ref                                      | 0.43 [0.27, 0.70] | 0.55 [0.32, 0.94] | 0.26 [0.12, 0.55] | 0.004              |                          |
| P-Value       |          |                                          | 0.001             | 0.029             | <0.001            |                    |                          |
| Median (g/d)  |          | 48.95                                    | 76.64             | 97.97             | 137.19            |                    |                          |
| High Income   | 160/1070 | Ref                                      | 0.78 [0.47, 1.28] | 0.89 [0.47, 1.65] | 0.44 [0.20, 0.95] | 0.041              |                          |
| P-Value       |          |                                          | 0.328             | 0.702             | 0.037             |                    |                          |

|                  |          |       |                   |                   |                   |        |       |
|------------------|----------|-------|-------------------|-------------------|-------------------|--------|-------|
| Median (g/d)     |          | 46.89 | 74.60             | 95.90             | 137.12            |        |       |
| Higher Educated  | 282/1706 | Ref   | 1.01 [0.69, 1.47] | 1.19 [0.78, 1.83] | 0.86 [0.49, 1.52] | 0.689  | 0.071 |
| P-Value          |          |       | 0.970             | 0.414             | 0.606             |        |       |
| Median (g/d)     |          | 34.40 | 57.46             | 74.17             | 108.10            |        |       |
| Lower Educated   | 167/462  | Ref   | 0.65 [0.37, 1.14] | 0.67 [0.35, 1.29] | 0.35 [0.15, 0.83] | 0.023  |       |
| P-Value          |          |       | 0.134             | 0.233             | 0.017             |        |       |
| Median (g/d)     |          | 39.87 | 66.42             | 92.88             | 133.07            |        |       |
| Current Smoking  | 60/270   | Ref   | 1.53 [0.89, 2.63] | 0.77 [0.36, 1.64] | 0.30 [0.15, 0.60] | 0.071  | 0.054 |
| P-Value          |          |       | 0.124             | 0.500             | 0.001             |        |       |
| Median (g/d)     |          | 43.62 | 70.57             | 88.98             | 130.97            |        |       |
| Former Smoking   | 198/698  | Ref   | 0.61 [0.37, 1.00] | 0.87 [0.53, 1.44] | 0.31 [0.15, 0.67] | 0.009  |       |
| P-Value          |          |       | 0.048             | 0.595             | 0.003             |        |       |
| Median (g/d)     |          | 44.94 | 69.43             | 93.76             | 136.75            |        |       |
| Never Smoking    | 191/1200 | Ref   | 1.30 [0.83, 2.06] | 0.82 [0.46, 1.45] | 1.11 [0.58, 2.15] | 0.899  |       |
| P-Value          |          |       | 0.253             | 0.491             | 0.748             |        |       |
| Median (g/d)     |          | 45.11 | 74.38             | 95.33             | 136.41            |        |       |
| Current Drinking | 255/1609 | Ref   | 0.89 [0.60, 1.33] | 1.29 [0.82, 2.02] | 0.77 [0.42, 1.41] | 0.635  | 0.056 |
| P-Value          |          |       | 0.577             | 0.275             | 0.404             |        |       |
| Median (g/d)     |          | 42.66 | 59.79             | 80.86             | 130.45            |        |       |
| Former Drinking  | 155/373  | Ref   | 0.20 [0.11, 0.39] | 0.45 [0.25, 0.81] | 0.16 [0.06, 0.40] | 0.005  |       |
| P-Value          |          |       | <0.001            | 0.008             | <0.001            |        |       |
| Median (g/d)     |          | 35.46 | 61.37             | 74.13             | 115.04            |        |       |
| Never Drinking   | 39/186   | Ref   | NA                | NA                | NA                | <0.001 |       |
| P-Value          |          |       | NA                | NA                | NA                |        |       |
| Median (g/d)     |          | 46.92 | 72.24             | 95.06             | 136.39            |        |       |
| BMI≥28           | 178/839  | Ref   | 0.57 [0.36, 0.91] | 0.40 [0.22, 0.72] | 0.41 [0.20, 0.82] | 0.014  | 0.758 |

|                 |          |       |                   |                   |                   |       |        |
|-----------------|----------|-------|-------------------|-------------------|-------------------|-------|--------|
| P-Value         |          |       | 0.019             | 0.002             | 0.012             |       |        |
| Median (g/d)    |          | 42.08 | 68.19             | 89.97             | 133.07            |       |        |
| BMI<28          | 271/1329 | Ref   | 1.02 [0.71, 1.48] | 1.15 [0.76, 1.73] | 0.69 [0.38, 1.27] | 0.384 |        |
| P-Value         |          |       | 0.908             | 0.512             | 0.233             |       |        |
| Median (g/d)    |          | 45.72 | 73.86             | 94.47             | 137.19            |       |        |
| Higher HEI      | 248/1082 | Ref   | 0.63 [0.42, 0.94] | 0.60 [0.37, 0.97] | 0.32 [0.17, 0.61] | 0.001 | <0.001 |
| P-Value         |          |       | 0.022             | 0.036             | 0.001             |       |        |
| Median (g/d)    |          | 40.32 | 66.03             | 87.86             | 128.89            |       |        |
| Lower HEI       | 201/1086 | Ref   | 0.96 [0.60, 1.52] | 1.20 [0.72, 2.00] | 1.48 [0.77, 2.85] | 0.162 |        |
| P-Value         |          |       | 0.853             | 0.489             | 0.238             |       |        |
| Median (g/d)    |          | 35.36 | 55.23             | 73.34             | 98.30             |       |        |
| Higher DII      | 240/1085 | Ref   | 0.71 [0.48, 1.04] | 0.89 [0.59, 1.34] | 1.37 [0.89, 2.12] | 0.217 | 0.028  |
| P-Value         |          |       | 0.079             | 0.561             | 0.154             |       |        |
| Median (g/d)    |          | 65.14 | 88.29             | 110.22            | 157.28            |       |        |
| Lower DII       | 209/1083 | Ref   | 1.30 [0.88, 1.93] | 0.54 [0.35, 0.84] | 0.78 [0.45, 1.36] | 0.045 |        |
| P-Value         |          |       | 0.185             | 0.006             | 0.380             |       |        |
| Median (g/d)    |          | 40.32 | 63.69             | 83.33             | 112.63            |       |        |
| Hypertension    | 281/783  | Ref   | 1.02 [0.70, 1.49] | 0.87 [0.55, 1.36] | 0.66 [0.37, 1.18] | 0.155 | 0.915  |
| P-Value         |          |       | 0.920             | 0.529             | 0.158             |       |        |
| Median (g/d)    |          | 45.30 | 74.30             | 96.83             | 137.75            |       |        |
| No Hypertension | 168/1385 | Ref   | 0.55 [0.32, 0.94] | 0.65 [0.36, 1.19] | 0.50 [0.24, 1.05] | 0.149 |        |
| P-Value         |          |       | 0.029             | 0.164             | 0.067             |       |        |
| Median (g/d)    |          | 41.89 | 67.65             | 89.22             | 128.02            |       |        |
| Hyperlipidemia  | 357/1556 | Ref   | 0.81 [0.59, 1.10] | 0.88 [0.63, 1.24] | 0.44 [0.26, 0.72] | 0.005 | 0.160  |
| P-Value         |          |       | 0.180             | 0.477             | 0.001             |       |        |
| Median (g/d)    |          | 46.89 | 76.64             | 98.23             | 149.15            |       |        |



|                   |          |       |                   |                   |                   |        |       |
|-------------------|----------|-------|-------------------|-------------------|-------------------|--------|-------|
| No Hyperlipidemia | 92/612   | Ref   | 0.36 [0.13, 0.97] | 0.76 [0.28, 2.07] | 1.53 [0.47, 4.94] | 0.284  |       |
| P-Value           |          |       | 0.043             | 0.592             | 0.480             |        |       |
| Median (g/d)      |          | 47.32 | 63.63             | 78.48             | 109.66            |        |       |
| Diabetes          | 99/201   | Ref   | 0.85 [0.35, 2.08] | 1.41 [0.54, 3.70] | 0.84 [0.29, 2.38] | 0.661  | 0.572 |
| P-Value           |          |       | 0.729             | 0.479             | 0.738             |        |       |
| Median (g/d)      |          | 42.66 | 71.59             | 93.41             | 135.83            |        |       |
| No Diabetes       | 350/1967 | Ref   | 0.76 [0.55, 1.06] | 0.79 [0.54, 1.17] | 0.74 [0.44, 1.25] | 0.317  |       |
| P-Value           |          |       | 0.105             | 0.243             | 0.260             |        |       |
| Median (g/d)      |          | 39.73 | 62.46             | 82.54             | 128.89            |        |       |
| Higher ACR        | 310/1078 | Ref   | 0.69 [0.49, 0.97] | 0.68 [0.46, 1.01] | 0.66 [0.39, 1.09] | 0.130  | 0.130 |
| P-Value           |          |       | 0.031             | 0.059             | 0.105             |        |       |
| Median (g/d)      |          | 52.13 | 76.64             | 97.87             | 143.59            |        |       |
| Lower ACR         | 139/1090 | Ref   | 0.85 [0.52, 1.38] | 0.64 [0.34, 1.17] | 0.36 [0.16, 0.80] | 0.007  |       |
| P-Value           |          |       | 0.500             | 0.146             | 0.012             |        |       |
| Median (g/d)      |          | 35.17 | 51.13             | 65.16             | 88.94             |        |       |
| CKD               | 110/130  | Ref   | 13.42[4.19,42.95] | 3.64[1.16, 11.43] | 0.23[0.08, 0.68]  | <0.001 | 0.614 |
| P-Value           |          |       | <0.001            | 0.027             | 0.008             |        |       |
| Median (g/d)      |          | 44.77 | 72.74             | 94.60             | 135.61            |        |       |
| No CKD            | 339/2038 | Ref   | 0.63 [0.45, 0.88] | 0.75 [0.51, 1.10] | 0.50 [0.30, 0.81] | 0.020  |       |
| P-Value           |          |       | 0.006             | 0.144             | 0.005             |        |       |

HRs and 95%CI were calculated with the use of Cox proportional hazards regression models. P-values for trend were obtained based on the median value for each quintile. P-values for interaction were calculated differently depending on the type of variable: for binary variables (age, gender, educational level, BMI, HEI, DII, hypertension, hyperlipidemia, diabetes, hypertension, ACR, and CKD), the interaction term was added directly to the model and its p-value was obtained; for multiple-category variables (income level, smoking status, and drinking status), p-values were calculated by likelihood ratio test, comparing the model with interaction to the model without interaction. BMI, body mass index, kg/m<sup>2</sup>; HEI, healthy eating index; DII, dietary inflammation index; ACR, urine albumin-to-creatinine ratio, mg/g; CKD, chronic kidney disease.

**Table S4 The impact of dietary protein intake on cardiovascular mortality of patients with selective glomerular hypofiltration syndromes across different competing risk models.**

| Models       | Quintile of Dietary Protein Intake (g/d) |                 |                  |                 | P-Values for Trend |
|--------------|------------------------------------------|-----------------|------------------|-----------------|--------------------|
|              | Q1, <57.93                               | Q2, 57.93-79.81 | Q3, 79.82-107.12 | Q4, ≥107.13     |                    |
| Median (g/d) | 43.62                                    | 69.53           | 92.88            | 134.09          |                    |
| Model1       | Ref                                      | 0.77[0.51,1.14] | 0.21[0.11,0.4]   | 0.16[0.08,0.32] | <0.001             |
| P-Value      |                                          | 0.190           | <0.001           | <0.001          |                    |
| Model2       | Ref                                      | 0.67[0.4,1.12]  | 0.2[0.09,0.47]   | 0.41[0.18,0.92] | 0.002              |
| P-Value      |                                          | 0.130           | <0.001           | 0.030           |                    |
| Model3       | Ref                                      | 0.51[0.29,0.89] | 0.13[0.05,0.32]  | 0.2[0.07,0.58]  | 0.001              |
| P-Value      |                                          | 0.018           | <0.001           | <0.001          |                    |
| Model4       | Ref                                      | 0.58[0.33,1.02] | 0.15[0.06,0.38]  | 0.26[0.09,0.75] | 0.003              |
| P-Value      |                                          | 0.059           | <0.001           | 0.012           |                    |
| Model5       | Ref                                      | 0.56[0.31,1.01] | 0.14[0.05,0.36]  | 0.23[0.08,0.69] | 0.002              |
| P-Value      |                                          | 0.054           | <0.001           | 0.001           |                    |

HRs and 97.5%CI were calculated with the use of competing risk models. P-values for trend were obtained based on the median value for each quintile. Model1, unadjusted for covariates; Model2, adjusted for age, gender, ethnicity, income level, and educational level; Model3: Model2 +smoking status, drinking status, body mass index (BMI, kg/m<sup>2</sup>), healthy eating index (HEI), and dietary inflammation index (DII); Model4, Model3+hypertension, hyperlipidemia, diabetes, cardiovascular disease, and medication usage (having angiotensin converting enzyme inhibitors, angiotensin-II receptor blocker,  $\beta$  blocker or spironolactone use at baseline) ; Model5, Model4+ urine albumin-to-creatinine ratio(ACR, mg/g), and chronic kidney disease.

**Table S5 The impact of dietary protein intake on cardiovascular mortality of patients with selective glomerular hypofiltration syndromes across different participants.**

| Quintile of Dietary Protein Intake (g/d) |       |                   |                   |                   |                    |
|------------------------------------------|-------|-------------------|-------------------|-------------------|--------------------|
| Models                                   | Q1    | Q2                | Q3                | Q4                | P-Values for Trend |
| Age≥65y, Death/n= 99/501                 |       |                   |                   |                   |                    |
| Median (g/d)                             | 38.51 | 59.59             | 76.13             | 104.86            |                    |
| Model1                                   | Ref   | 0.73 [0.42, 1.24] | 0.98 [0.59, 1.60] | 0.29 [0.15, 0.57] | 0.001              |
| P Value                                  |       | 0.245             | 0.922             | <0.001            |                    |
| Model2                                   | Ref   | 0.73 [0.42, 1.26] | 0.88 [0.50, 1.55] | 0.28 [0.13, 0.58] | 0.001              |
| P Value                                  |       | 0.257             | 0.656             | 0.001             |                    |
| Model3                                   | Ref   | 0.60 [0.32, 1.13] | 0.67 [0.34, 1.30] | 0.23 [0.09, 0.58] | 0.003              |
| P Value                                  |       | 0.114             | 0.239             | 0.002             |                    |
| Model4                                   | Ref   | 0.76 [0.39, 1.51] | 0.67 [0.33, 1.32] | 0.23 [0.09, 0.59] | 0.003              |
| P Value                                  |       | 0.435             | 0.244             | 0.002             |                    |
| Model5                                   | Ref   | 0.69 [0.34, 1.38] | 0.77 [0.38, 1.57] | 0.26 [0.10, 0.69] | 0.009              |
| P Value                                  |       | 0.290             | 0.473             | 0.007             |                    |
| Male, Death/n=69/1359                    |       |                   |                   |                   |                    |
| Median (g/d)                             | 54.12 | 79.14             | 104.20            | 145.65            |                    |
| Model1                                   | Ref   | 0.83 [0.49, 1.40] | 0.24 [0.11, 0.51] | 0.08 [0.02, 0.26] | <0.001             |
| P Value                                  |       | 0.487             | <0.001            | <0.001            |                    |
| Model2                                   | Ref   | 0.37 [0.21, 0.65] | 0.23 [0.10, 0.51] | 0.13 [0.04, 0.42] | <0.001             |
| P Value                                  |       | 0.001             | <0.001            | 0.001             |                    |
| Model3                                   | Ref   | 0.42 [0.22, 0.78] | 0.26 [0.10, 0.67] | 0.12 [0.03, 0.48] | <0.001             |
| P Value                                  |       | 0.006             | 0.005             | 0.003             |                    |
| Model4                                   | Ref   | 0.40 [0.21, 0.77] | 0.21 [0.08, 0.56] | 0.12 [0.03, 0.48] | <0.001             |
| P Value                                  |       | 0.006             | 0.002             | 0.003             |                    |

|                                   |       |                   |                   |                   |        |
|-----------------------------------|-------|-------------------|-------------------|-------------------|--------|
| Model5                            | Ref   | 0.36 [0.18, 0.70] | 0.19 [0.07, 0.51] | 0.11 [0.03, 0.43] | <0.001 |
| P Value                           |       | 0.003             | 0.001             | 0.002             |        |
| Higher Educated, Death/n= 82/1706 |       |                   |                   |                   |        |
| Median (g/d)                      | 46.89 | 74.60             | 95.90             | 137.12            |        |
| Model1                            | Ref   | 0.62 [0.37, 1.02] | 0.30 [0.16, 0.58] | 0.14 [0.06, 0.33] | <0.001 |
| P Value                           |       | 0.061             | <0.001            | <0.001            |        |
| Model2                            | Ref   | 0.54 [0.29, 1.03] | 0.28 [0.13, 0.59] | 0.21 [0.08, 0.57] | <0.001 |
| P Value                           |       | 0.063             | 0.001             | 0.002             |        |
| Model3                            | Ref   | 0.58 [0.28, 1.19] | 0.25 [0.10, 0.66] | 0.16 [0.05, 0.59] | 0.003  |
| P Value                           |       | 0.139             | 0.005             | 0.006             |        |
| Model4                            | Ref   | 0.61 [0.30, 1.23] | 0.22 [0.08, 0.61] | 0.20 [0.06, 0.69] | 0.005  |
| P Value                           |       | 0.170             | 0.003             | 0.011             |        |
| Model5                            | Ref   | 0.60 [0.29, 1.23] | 0.23 [0.08, 0.64] | 0.19 [0.05, 0.69] | 0.006  |
| P Value                           |       | 0.162             | 0.005             | 0.011             |        |
| No Diabetes, Death/n= 96/1967     |       |                   |                   |                   |        |
| Median (g/d)                      | 42.66 | 71.59             | 93.41             | 135.83            |        |
| Model1                            | Ref   | 0.64 [0.41, 1.02] | 0.24 [0.13, 0.46] | 0.17 [0.08, 0.36] | <0.001 |
| P Value                           |       | 0.063             | <0.001            | <0.001            |        |
| Model2                            | Ref   | 0.42 [0.24, 0.73] | 0.26 [0.13, 0.55] | 0.24 [0.10, 0.56] | <0.001 |
| P Value                           |       | 0.002             | <0.001            | 0.001             |        |
| Model3                            | Ref   | 0.34 [0.18, 0.64] | 0.22 [0.09, 0.54] | 0.17 [0.05, 0.51] | 0.002  |
| P Value                           |       | 0.001             | 0.001             | 0.002             |        |
| Model4                            | Ref   | 0.38 [0.20, 0.70] | 0.30 [0.13, 0.73] | 0.28 [0.09, 0.85] | 0.018  |
| P Value                           |       | 0.002             | 0.007             | 0.025             |        |
| Model5                            | Ref   | 0.36 [0.19, 0.68] | 0.29 [0.12, 0.70] | 0.26 [0.08, 0.80] | 0.015  |
| P Value                           |       | 0.001             | 0.006             | 0.019             |        |

|                          |       |                   |                   |                   |        |
|--------------------------|-------|-------------------|-------------------|-------------------|--------|
| No CKD, Death/n= 87/2038 |       |                   |                   |                   |        |
| Median (g/d)             | 44.77 | 72.74             | 94.60             | 135.61            |        |
| Model1                   | Ref   | 0.83 [0.51, 1.35] | 0.32 [0.17, 0.62] | 0.22 [0.11, 0.47] | <0.001 |
| P Value                  |       | 0.457             | 0.001             | <0.001            |        |
| Model2                   | Ref   | 0.40 [0.22, 0.75] | 0.30 [0.14, 0.64] | 0.22 [0.09, 0.53] | 0.001  |
| P Value                  |       | 0.004             | 0.002             | 0.001             |        |
| Model3                   | Ref   | 0.26 [0.13, 0.52] | 0.19 [0.08, 0.46] | 0.10 [0.03, 0.29] | <0.001 |
| P Value                  |       | <0.001            | <0.001            | <0.001            |        |
| Model4                   | Ref   | 0.33 [0.16, 0.67] | 0.27 [0.11, 0.68] | 0.17 [0.06, 0.54] | 0.005  |
| P Value                  |       | 0.002             | 0.005             | 0.002             |        |
| Model5                   | Ref   | 0.32 [0.16, 0.65] | 0.25 [0.10, 0.65] | 0.16 [0.05, 0.50] | 0.004  |
| P Value                  |       | 0.002             | 0.004             | 0.002             |        |

HRs and 95%CI were calculated with the use of Cox proportional hazards regression models. P-values for trend were obtained based on the median value for each quintile. Model1, unadjusted for covariates; Model2, adjusted for age, gender, ethnicity, income level, and educational level; Model3: Model2 +smoking status, drinking status, body mass index (BMI, kg/m2), healthy eating index (HEI), and dietary inflammation index (DII); Model4, Model3+hypertension, hyperlipidemia, diabetes, cardiovascular disease, and medication usage (having angiotensin converting enzyme inhibitors, angiotensin-II receptor blocker,  $\beta$  blocker or spironolactone use at baseline) ; Model5, Model4+ urine albumin-to-creatinine ratio(ACR, mg/g), and chronic kidney disease.

**Table S6 The impact of red meat on all-cause and cardiovascular mortality of patients with selective glomerular hypofiltration syndromes across different models.**

| Quintile of Red Meat Consumption (g/d) |            |                   |                   |                   |                    |
|----------------------------------------|------------|-------------------|-------------------|-------------------|--------------------|
| Models                                 | Q1, <30.50 | Q2, 30.50-141.99  | Q3, 142.00-319.23 | Q4, $\geq$ 319.24 | P-Values for Trend |
| Median (g/d)                           | 0.00       | 90.51             | 228.87            | 466.00            |                    |
| All-Cause Mortality, Death/n= 404/1988 |            |                   |                   |                   |                    |
| Model1                                 | Ref        | 1.08 [0.83, 1.39] | 0.81 [0.62, 1.06] | 0.61 [0.46, 0.83] | <0.001             |
| P Value                                |            | 0.569             | 0.126             | 0.001             |                    |
| Model2                                 | Ref        | 1.24 [0.95, 1.62] | 1.00 [0.76, 1.31] | 0.92 [0.68, 1.25] | 0.299              |

|                                             |     |                   |                   |                   |       |
|---------------------------------------------|-----|-------------------|-------------------|-------------------|-------|
| P Value                                     |     | 0.106             | 0.983             | 0.591             |       |
| Model3                                      | Ref | 1.29 [0.98, 1.70] | 1.06 [0.80, 1.41] | 1.05 [0.77, 1.44] | 0.874 |
| P Value                                     |     | 0.073             | 0.683             | 0.748             |       |
| Model4                                      | Ref | 1.33 [1.00, 1.76] | 1.04 [0.78, 1.38] | 1.02 [0.74, 1.41] | 0.648 |
| P Value                                     |     | 0.050             | 0.799             | 0.897             |       |
| Model5                                      | Ref | 1.19 [0.90, 1.59] | 1.03 [0.77, 1.38] | 1.02 [0.74, 1.40] | 0.837 |
| P Value                                     |     | 0.227             | 0.818             | 0.903             |       |
| Cardiovascular Mortality, Death/n= 108/1988 |     |                   |                   |                   |       |
| Model1                                      | Ref | 1.25 [0.77, 2.02] | 0.68 [0.39, 1.19] | 0.72 [0.41, 1.26] | 0.073 |
| P Value                                     |     | 0.373             | 0.176             | 0.252             |       |
| Model2                                      | Ref | 2.00 [1.18, 3.39] | 1.03 [0.58, 1.84] | 1.34 [0.76, 2.39] | 0.773 |
| P Value                                     |     | 0.010             | 0.921             | 0.311             |       |
| Model3                                      | Ref | 2.66 [1.49, 4.74] | 1.18 [0.64, 2.16] | 1.19 [0.65, 2.20] | 0.760 |
| P Value                                     |     | 0.001             | 0.596             | 0.568             |       |
| Model4                                      | Ref | 3.08 [1.68, 5.67] | 1.10 [0.58, 2.10] | 1.04 [0.55, 1.96] | 0.326 |
| P Value                                     |     | <0.001            | 0.773             | 0.900             |       |
| Model5                                      | Ref | 3.14 [1.68, 5.84] | 1.11 [0.58, 2.12] | 1.04 [0.55, 1.97] | 0.323 |
| P Value                                     |     | <0.001            | 0.754             | 0.902             |       |

HRs and 95%CIs were calculated with the use of Cox proportional hazards regression models. P-values for trend were obtained based on the median value for each quintile. Model1, unadjusted for covariates; Model2, adjusted for age, gender, ethnicity, income level, and educational level; Model3: Model2 +smoking status, drinking status, body mass index (BMI, kg/m<sup>2</sup>), healthy eating index (HEI), and dietary inflammation index (DII); Model4, Model3+hypertension, hyperlipidemia, diabetes, cardiovascular disease, and medication usage (having angiotensin converting enzyme inhibitors, angiotensin-II receptor blocker,  $\beta$  blocker or spironolactone use at baseline) ; Model5, Model4+ urine albumin-to-creatinine ratio (ACR, mg/g), and chronic kidney disease

**Table S7 The impact of other protein food on all-cause and cardiovascular mortality of patients with selective glomerular hypofiltration syndromes across different models.**

| Quintile of Other Protein Food Consumption (g/d) |
|--------------------------------------------------|
|--------------------------------------------------|

| Models                                      | Q1, <128.45 | Q2, 128.45-376.49 | Q3, 376.50-739.31 | Q4, ≥739.32       | P-Values for Trend |
|---------------------------------------------|-------------|-------------------|-------------------|-------------------|--------------------|
| Median (g/d)                                | 0.00        | 97.89             | 241.50            | 536.50            |                    |
| All-Cause Mortality, Death/n= 413/1959      |             |                   |                   |                   |                    |
| Model1                                      | Ref         | 1.37 [1.07, 1.76] | 0.96 [0.73, 1.26] | 0.54 [0.39, 0.75] | <0.001             |
| P Value                                     |             | 0.014             | 0.785             | <0.001            |                    |
| Model2                                      | Ref         | 1.24 [0.96, 1.61] | 1.20 [0.90, 1.59] | 0.71 [0.51, 0.99] | 0.018              |
| P Value                                     |             | 0.101             | 0.207             | 0.043             |                    |
| Model3                                      | Ref         | 1.23 [0.94, 1.60] | 1.10 [0.81, 1.49] | 0.67 [0.48, 0.94] | 0.004              |
| P Value                                     |             | 0.134             | 0.559             | 0.022             |                    |
| Model4                                      | Ref         | 1.25 [0.96, 1.64] | 1.12 [0.83, 1.52] | 0.66 [0.47, 0.92] | 0.003              |
| P Value                                     |             | 0.097             | 0.460             | 0.016             |                    |
| Model5                                      | Ref         | 1.15 [0.88, 1.51] | 1.17 [0.87, 1.59] | 0.61 [0.43, 0.86] | 0.002              |
| P Value                                     |             | 0.303             | 0.303             | 0.005             |                    |
| Cardiovascular Mortality, Death/n= 108/1959 |             |                   |                   |                   |                    |
| Model1                                      | Ref         | 0.95 [0.61, 1.47] | 0.43 [0.25, 0.75] | 0.22 [0.10, 0.44] | <0.001             |
| P Value                                     |             | 0.818             | 0.003             | <0.001            |                    |
| Model2                                      | Ref         | 0.77 [0.48, 1.24] | 0.53 [0.29, 0.96] | 0.30 [0.14, 0.65] | 0.001              |
| P Value                                     |             | 0.286             | 0.035             | 0.002             |                    |
| Model3                                      | Ref         | 0.71 [0.43, 1.15] | 0.34 [0.17, 0.69] | 0.27 [0.13, 0.59] | <0.001             |
| P Value                                     |             | 0.163             | 0.003             | 0.001             |                    |
| Model4                                      | Ref         | 0.67 [0.40, 1.13] | 0.37 [0.19, 0.75] | 0.28 [0.13, 0.62] | 0.001              |
| P Value                                     |             | 0.133             | 0.006             | 0.002             |                    |
| Model5                                      | Ref         | 0.67 [0.39, 1.15] | 0.38 [0.19, 0.76] | 0.28 [0.12, 0.62] | 0.001              |
| P Value                                     |             | 0.143             | 0.007             | 0.002             |                    |

HRs and 95%CI were calculated with the use of Cox proportional hazards regression models. P-values for trend were obtained based on the median value for each quintile. Model1, unadjusted for covariates; Model2, adjusted for age, gender, ethnicity, income level, and educational level; Model3: Model2 +smoking status, drinking status, body mass index (BMI, kg/m2), healthy eating index

(HEI), and dietary inflammation index (DII); Model4, Model3+hypertension, hyperlipidemia, diabetes, cardiovascular disease, and medication usage (having angiotensin converting enzyme inhibitors, angiotensin-II receptor blocker,  $\beta$  blocker or spironolactone use at baseline) ; Model5, Model4+ urine albumin-to-creatinine ratio (ACR, mg/g), and chronic kidney disease



**Table S8 The difference of chronic kidney disease (CKD) and urine albumin-to-creatinine ratio (ACR) between male and female at baseline.**

| Characteristic | Overall, N = 2,168* | Male, N = 1,359* | Female, N = 809* | p-value# |
|----------------|---------------------|------------------|------------------|----------|
| CKD            |                     |                  |                  | <0.001   |
| Yes            | 130 (6.00%)         | 60 (4.42%)       | 70 (8.65%)       |          |
| No             | 2,038 (94.00%)      | 1,299 (95.58%)   | 739 (91.35%)     |          |
| ACR (mg/g)     | 4.66 (3.33~7.21)    | 4.12 (3.10~6.67) | 5.57 (3.86~8.70) | <0.001   |

\*Median (IQR); frequency (%). # Kruskal-Wallis rank sum test for continuous variables; Pearson's Chi-squared test for categorical variables. CKD, chronic kidney disease; ACR, urine albumin-to-creatinine ratio

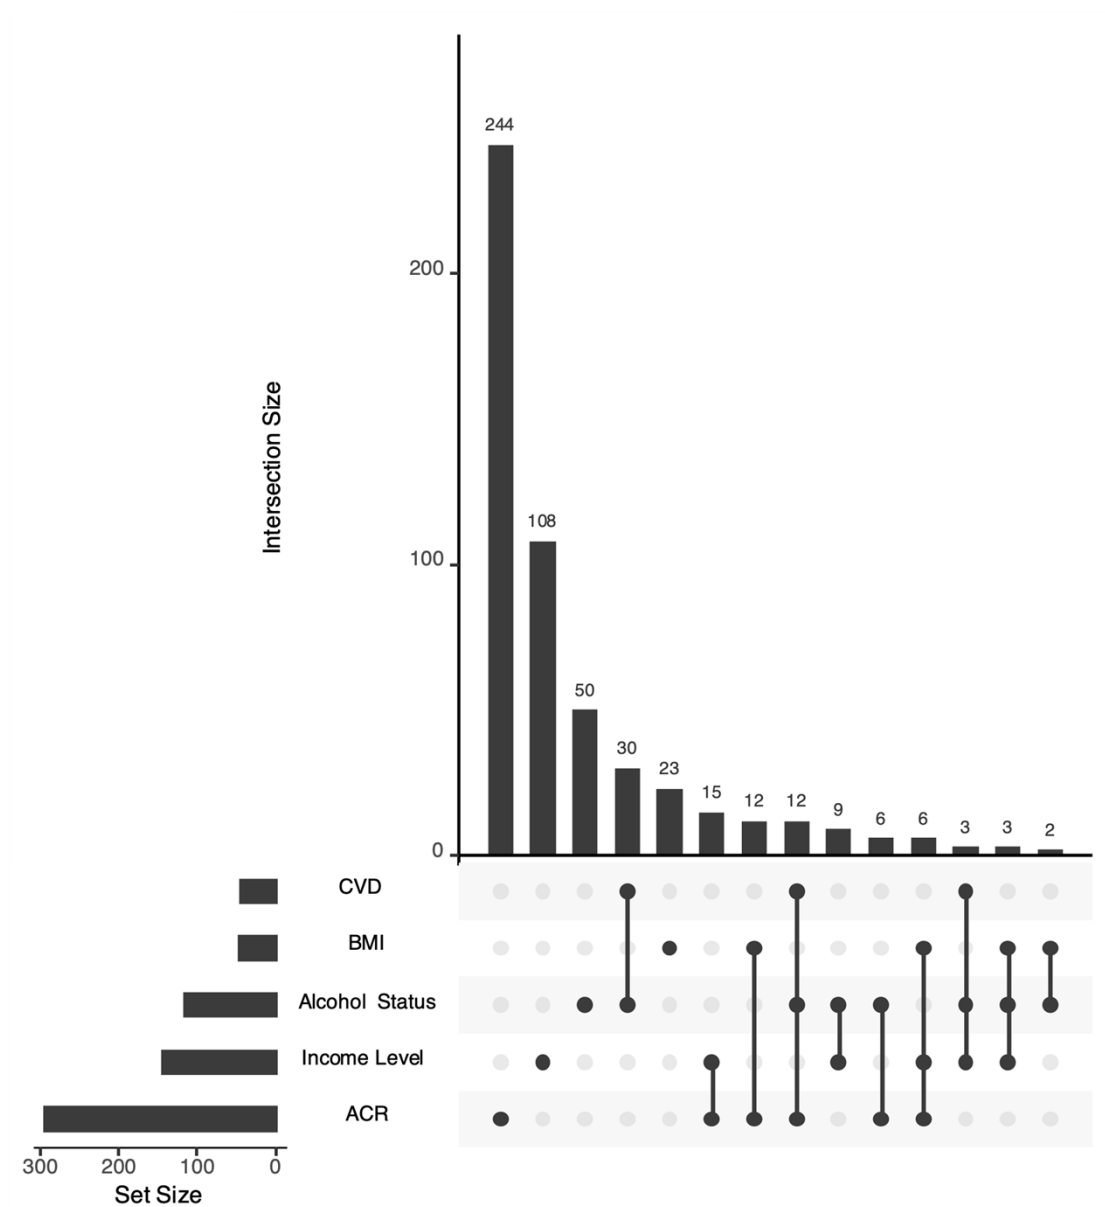

**Fig. S1** Missing data. CVD, cardiovascular disease; BMI, body mass index, kg/m<sup>2</sup>; ACR, urine albumin-to-creatinine ratio, mg/g.

A: Death from All-Cause

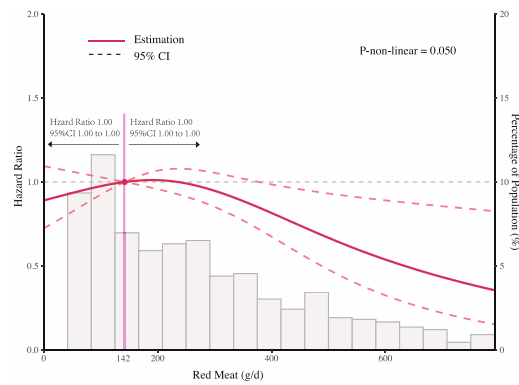

B: Death from Cardiovascular Disease

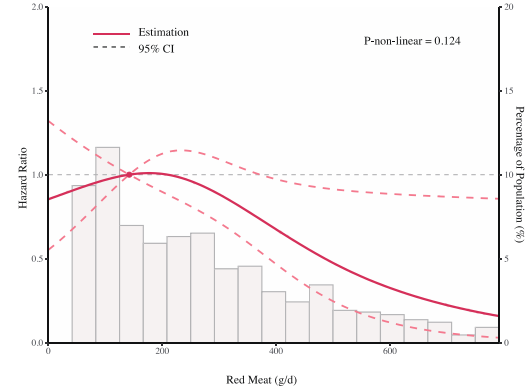

**Fig. S2** Adjusted hazard ratio for the association between red meat intake and all-cause and cardiovascular mortality. A: all-cause mortality; B: cardiovascular mortality. Data were fitted using Cox proportional hazard models with restricted cubic spline (RCS) with 3 knots (the 10th, 50th, and 90th percentiles) for red meat intake, adjusted for potential covariates. Reference is the 50th percentile of dietary protein intake (142.00 g/d).

A: Death from All-Cause

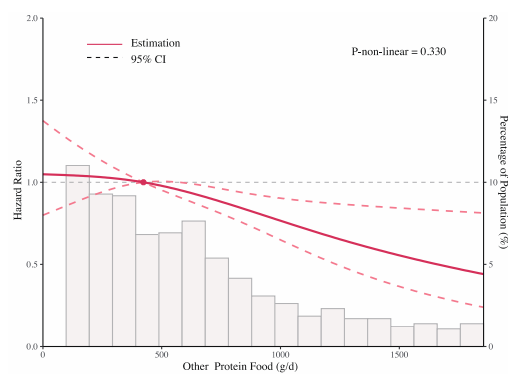

B: Death from Cardiovascular Disease

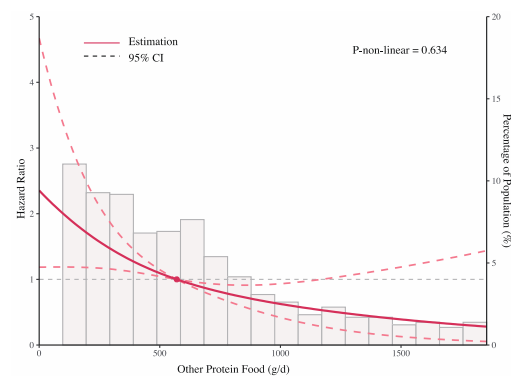

**Fig. S3** Adjusted hazard ratio for the association between other protein food intake and all-cause and cardiovascular mortality. A: all-cause mortality; B: cardiovascular mortality. Data were fitted using Cox proportional hazard models with restricted cubic spline (RCS) with 3 knots (the 10th, 50th, and 90th percentiles) for other protein food, adjusted for potential covariates. Reference is the 50th percentile of dietary protein intake (376.50 g/d).

References:

1. Yuan S, Song C, Zhang R, He J, Dou K. Dietary Inflammation Index and Its Association with Long-Term All-Cause and Cardiovascular Mortality in the General US Population by Baseline Glycemic Status. *Nutrients*. Jun 21 2022;14(13)doi:10.3390/nu14132556
2. Johnson CL, Paulose-Ram R, Ogden CL, et al. National health and nutrition examination survey: analytic guidelines, 1999-2010. *Vital Health Stat* 2. Sep 2013;(161):1-24.
3. Park SK, Sack C, Sirén MJ, Hu H. Environmental Cadmium and Mortality from Influenza and Pneumonia in U.S. Adults. *Environ Health Perspect*. Dec 2020;128(12):127004. doi:10.1289/ehp7598
4. Hicks CW, Wang D, Matsushita K, Windham BG, Selvin E. Peripheral Neuropathy and All-Cause and Cardiovascular Mortality in U.S. Adults : A Prospective Cohort Study. *Ann Intern Med*. Feb 2021;174(2):167-174. doi:10.7326/M20-1340
5. Wolk A. Potential health hazards of eating red meat. *J Intern Med*. Feb 2017;281(2):106-122. doi:10.1111/joim.12543
6. Friday JE, Bowman, S.A. MyPyramid Equivalents Database for USDA Survey Food Codes, 1994-2002 Version 1.0. [Online]. Beltsville, MD: USDA, Agricultural Research Service, Beltsville Human Nutrition Research Center, Community Nutrition Research Group. Available at: <http://www.barc.usda.gov/bhnrc/cnrg>.
